1 **Title:** Lower cognitive set shifting ability is associated with stiffer balance recovery behavior and larger  
2 perturbation-evoked cortical responses in older adults

3  
4 **Running Title:** Set shifting and balance recovery

5  
6 **Authors:** Aiden M. Payne<sup>1</sup>, Jacqueline A. Palmer<sup>1</sup>, J. Lucas McKay<sup>2,3,4</sup>, and Lena H. Ting<sup>1,4\*</sup>

7  
8 **Affiliations:**

9 <sup>1</sup>Division of Physical Therapy, Department of Rehabilitation Medicine, Emory University, Atlanta, GA,  
10 United States

11 <sup>2</sup>Department of Biomedical Informatics, Emory University School of Medicine, Atlanta, Georgia, United  
12 States of America

13 <sup>3</sup>Jean & Paul Amos PD & Movement Disorders Program, Department of Neurology, Emory University  
14 School of Medicine, Atlanta, Georgia, United States of America

15 <sup>4</sup>Wallace H. Coulter Department of Biomedical Engineering, Emory University and Georgia Tech,  
16 Atlanta, Georgia, United States of America

17  
18 **Correspondence:**

19 L. H. Ting (lting@emory.edu).

20  
21 **Key Words:** posture, aging, cortex, antagonist, cocontraction, EEG,

22  
23

24 **1. Abstract:**

25  
26 The mechanisms underlying associations between cognitive set shifting impairments and balance  
27 dysfunction are unclear. Cognitive set shifting refers to the ability to flexibly adjust behavior to changes  
28 in task rules or contexts, which could be involved in flexibly adjusting balance recovery behavior to  
29 different contexts, such as the direction the body is falling. Prior studies found associations between  
30 cognitive set shifting impairments and severe balance dysfunction in populations experiencing frequent  
31 falls. The objective of this study was to test whether cognitive set shifting ability is expressed in  
32 successful balance recovery behavior in older adults with high clinical balance ability (N=19, 71 ± 7  
33 years, 6 female). We measured cognitive set shifting ability using the Trail Making Test and clinical  
34 balance ability using the miniBESTest. For most participants, cognitive set shifting performance (Trail  
35 Making Test B-A = 37 ± 20s) was faster than normative averages (46s for comparable age and  
36 education levels), and balance ability scores (miniBESTest = 25 ± 2 / 28) were above the threshold for  
37 fall risk (23 for people between 70-80 years). Reactive balance recovery in response to support-surface  
38 translations in anterior and posterior directions was assessed in terms of body motion, muscle activity,  
39 and brain activity. Across participants, lower cognitive set shifting ability was associated with smaller  
40 peak center of mass displacement during balance recovery, lower directional specificity of late phase  
41 balance-correcting muscle activity (i.e., greater antagonist muscle activity 200-300ms after perturbation  
42 onset), and larger cortical N1 responses (100-200ms). None of these measures were associated with  
43 clinical balance ability. Our results suggest that cognitive set shifting ability is expressed in balance  
44 recovery behavior even in the absence of profound clinical balance disability. Specifically, our results  
45 suggest that lower flexibility in cognitive task performance is associated with lower ability to incorporate  
46 the directional context into the cortically-mediated later phase of the motor response. The resulting  
47 antagonist activity and stiffer balance behavior may help explain associations between cognitive set  
48 shifting impairments and frequent falls.

49  
50

## 51 2. INTRODUCTION

52  
53 Cognitive impairment is associated with balance dysfunction, but it is unclear whether or how cognitive  
54 ability relates to balance recovery behavior in relatively high-functioning preclinical populations. Subtle  
55 cognitive impairments in executive function (Muir et al., 2012), attention, and memory are associated  
56 with clinical balance impairments (Tangen et al., 2014) and predict the first (Herman et al., 2010) and  
57 recurring falls in older adults (Gleason et al., 2009; Mirelman et al., 2012). However, it is unclear  
58 whether subtle differences in cognitive ability in the absence of clinically detectable balance dysfunction  
59 are associated with changes in balance control. Associations between cognitive function and balance  
60 control could provide mechanistic insight into findings that cognitive engagement in balance control  
61 increases with age (Rankin et al., 2000), fall history (Shumway-Cook et al., 1997), and fall risk (Lundin-  
62 Olsson et al., 1997). Here, we focus on individual differences in cognitive set shifting ability (i.e., the  
63 ability to flexibly adjust a behavior to changes in task rules or contexts), which have previously been  
64 associated with clinical balance dysfunction (Tangen et al., 2014), fall history (McKay et al., 2018), and  
65 fall risk (Herman et al., 2010). We investigate balance recovery behavior in terms of body motion,  
66 muscle activity, and brain activity evoked by a sudden balance disturbance, in contrast to prior studies  
67 that used clinical instruments and falls tracking, which are less applicable to preclinical populations.  
68 Identifying associations between cognitive ability and balance recovery behavior in preclinical  
69 populations could provide insight into underlying mechanisms for balance impairments that could serve  
70 as therapeutic targets for rehabilitation prior to occurrence of a fall.

71  
72 Cognitive set shifting is an executive function that pertains to the ability to flexibly adjust behavior to  
73 changes in task rules or contexts, but its potential role in balance behavior is unclear. The Trail Making  
74 Test is a common pen and paper assessment of cognitive set shifting, consisting of two parts. In Part A,  
75 a participant must rapidly draw lines to connect dots in numerical order, relying on sustained attention,  
76 working memory, visuomotor search, and dexterity (Sanchez-Cubillo et al., 2009). In Part B, the task is  
77 altered to incorporate switching between numbers and letters (1-A-2-B-3-C...), thereby adding in a  
78 component of cognitive set shifting (Sanchez-Cubillo et al., 2009). Scoring the difference in time to  
79 complete Part B – Part A accounts for the overlapping motor and cognitive aspects, leaving a relatively  
80 pure measure of cognitive set shifting (Sanchez-Cubillo et al., 2009). However, the construct of set  
81 shifting inherently includes an increased working memory load to maintain and switch between two rule  
82 sets, as well as response selection and inhibition to select the response according to the current rule  
83 set while suppressing the response to the previous rule set (Koch et al., 2010). Because the Trail  
84 Making Test is so far removed from standing balance behavior, it is unclear why it has been repeatedly  
85 associated with advanced balance impairments (Herman et al., 2010; Tangen et al., 2014; McKay et  
86 al., 2018). However, if the neural mechanisms for cognitive set shifting assessed by the Trail Making  
87 Test are involved in balance control, then variation in cognitive set shifting ability should be expressed  
88 in successful balance recovery behavior before people begin experiencing frequent falls.

89  
90 Similar to effective cognitive control, successful balance recovery behavior requires quick and flexible  
91 execution of a contextually appropriate behavior. Support-surface translational perturbations rapidly  
92 displace the base of support (i.e., the feet) relative to the body's center of mass, requiring a rapid neural  
93 and mechanical reaction to prevent a fall. Effective balance recovery behavior involves directionally  
94 specific motor responses, with muscles showing preferential activation in response to perturbation  
95 directions in which they can generate torque to counteract center of mass displacement (Henry et al.,  
96 1998; Torres-Oviedo and Ting, 2007). This type of directional specificity is reduced in people with  
97 balance impairments (Lang et al., 2019), resulting in simultaneous agonist-antagonist cocontraction,  
98 which increases joint stiffness, but ultimately limits joint torques as the actions of the agonist and  
99 antagonist muscles partially resist one another (Damiano, 1993). Although cocontraction is common  
100 when learning new or complex motor skills and can be beneficial in some contexts (Damiano, 1993), its  
101 association to balance impairments suggests it is not an ideal strategy for balance recovery behavior  
102 (Lang et al., 2019). It has been suggested that cognitive flexibility, a broader construct containing

103 cognitive set shifting, may be needed to quickly adjust behavior to unpredictable demands, including  
104 the use of feedback from the body or environment to appropriately react to a sudden displacement of  
105 the body's center of mass (Pieruccini-Faria et al., 2019). Here, we test whether cognitive set shifting  
106 ability is associated with the ability to modulate muscle activity between balance perturbations that  
107 displace the body's center of mass in opposite directions.

108  
109 Testing different phases of the motor response for associations to cognitive ability could provide insight  
110 into different mechanisms by which cognitive function may overlap with balance recovery behavior. A  
111 sudden balance perturbation evokes a relatively stereotyped brainstem-mediated balance-correcting  
112 motor response at ~100 ms via integrated sensory inputs reflecting the task-level goal of upright  
113 posture, and not the local stretch of individual muscles (Nashner, 1979; Horak and Nashner, 1986;  
114 Dietz et al., 1987; Safavynia and Ting, 2013b). While this early response is subcortically-mediated, it  
115 can be influenced by pre-perturbation cognitive state, including arousal (Carpenter et al., 2004),  
116 expectations (Horak et al., 1989), and intentions (McIlroy and Maki, 1993; Burleigh et al., 1994;  
117 Burleigh and Horak, 1996; Weerdesteyn et al., 2008) in ways that may depend on descending cortical  
118 influence in anticipation of an upcoming balance disturbance. More variable motor responses occur at  
119 longer latencies (>150 ms) that can incorporate cortically-mediated motor responses to the balance  
120 disturbance (Jacobs and Horak, 2007a). Cognitive dual task interference is limited to this later phase of  
121 the motor response, suggesting only the later phase depends on online cognitive processing (Rankin et  
122 al., 2000). If cognitive set shifting is associated with directional specificity in the early phase of the  
123 response, this would implicate cognitive set shifting in the maintenance of "central set," which refers to  
124 the ability of the central nervous system to preselect the gain of stimulus-evoked behaviors in  
125 consideration of arousal, expectations, and intentions (Prochazka, 1989). If cognitive set shifting is  
126 associated with directional specificity only in the later phase, this would implicate cognitive set shifting  
127 in cortically-mediated reactions to the balance perturbation, which can incorporate incoming sensory  
128 information into decisions about how to react.

129  
130 Balance perturbations also evoke a cortical response that is associated with balance ability and  
131 cognitive processing, but it is unknown whether this cortical response reflects individual differences in  
132 cognitive ability. A cortical response, termed the "N1" for the first negative peak in the evoked  
133 electroencephalography signal, occurs in the supplementary motor area ~150 ms after a balance  
134 disturbance (Marlin et al., 2014; Mierau et al., 2015). We have previously suggested that the cortical N1  
135 may reflect compensatory cortical engagement in balance recovery because it is enhanced in young  
136 adults with lower balance ability (Payne and Ting, 2020a) and on trials in which compensatory steps  
137 are taken (Payne and Ting, 2020c). The cortical N1 is also influenced by cognitive processes including  
138 attention (Quant et al., 2004b; Little and Woollacott, 2015), perceived threat (Adkin et al., 2008;  
139 Mochizuki et al., 2010), and predictability (Adkin et al., 2006; Adkin et al., 2008; Mochizuki et al., 2008;  
140 Mochizuki et al., 2010) and may therefore reflect cognitive-motor interactions. The possibility that the  
141 N1 reflects cognitive-motor interactions is further supported by its localization to the supplementary  
142 motor area (Marlin et al., 2014; Mierau et al., 2015), which is thought to mediate interactions between  
143 cognitive and motor processes by mediating interactions between neighboring prefrontal and motor  
144 cortical areas (Goldberg, 1985). Although investigations of the cortical N1 in older populations have  
145 been limited (Duckrow et al., 1999; Ozdemir et al., 2018), the N1 may be ideally suited for investigating  
146 relationships between cognitive and motor impairments with aging. Here, we test whether the cortical  
147 N1 is associated with individual differences in cognitive set shifting ability.

148  
149 We investigated whether individual differences in cognitive set shifting ability were associated with  
150 perturbation-evoked balance recovery behavior and cortical activity in an older population with relatively  
151 high balance function to gain insight into possible mechanisms linking balance and cognitive function.  
152 We assessed clinical balance ability with the mini Balance Evaluation Systems Test (miniBESTest)  
153 (Magnani et al., 2020) and cognitive set shifting ability with the Trail Making Test (Tombaugh, 2004;  
154 Sanchez-Cubillo et al., 2009). We tested these ability measures for association with perturbation-  
155 evoked balance recovery behavior, including whole body stiffness, directional specificity of ankle

156 muscle activity in early and late phases of the motor response, and the evoked cortical N1 response.  
157 We found that individuals with lower cognitive set shifting ability had stiffer behavior, less directional  
158 specificity of muscle activity, and larger cortical responses, revealing aspects of behavior that may  
159 share neural mechanisms involved in cognitive set shifting behavior.

160

### 161 3. METHODS

162

163 **3.1 Participants.** Nineteen older adults (age  $71 \pm 6$ , 6 female) participated in this study. Written consent  
164 was obtained from all participants after a detailed explanation of the protocol according to procedures  
165 approved by the Emory University Institutional Review Board.

166 Participants were recruited from Emory University and the surrounding community. Adults over  
167 55 years of age were screened for the following inclusion criteria: vision can be corrected to 20/40 or  
168 better with corrective lenses, no history of stroke or other neurologic condition, no musculoskeletal  
169 conditions or procedures that cause pain or limit mobility of the legs, ability to stand unassisted for at  
170 least 15 minutes, and cognitive ability to provide informed consent. Potential participants were excluded  
171 for prior experience on the perturbation platform. Study data were collected and managed using a  
172 Research Electronic Data Capture (REDCap) database hosted at Emory University (Harris et al., 2009;  
173 Harris et al., 2019).

174

175 **3.2 Balance ability.** The miniBESTest ([www.bestest.us](http://www.bestest.us)) was used as a measure of balance ability  
176 (Magnani et al., 2020) which assesses anticipatory postural control, reactive postural control, sensory  
177 orientation, and dynamic gait.

178

179 **3.3 Set shifting ability.** The set shifting ability score was measured as the difference in time to  
180 complete Part B minus Part A of the Trail Making Test (Sanchez-Cubillo et al., 2009; McKay et al.,  
181 2018). Part A requires participants to quickly connect sequentially numbered dots (1-2-3, etc.) and is a  
182 test of visuomotor search and psychomotor speed. Part B is similarly formatted but requires participants  
183 to shift between numbers and letters (1-A-2-B, etc.), which tests the same domains with the additional  
184 requirement that participants shift between the numbers and letters. A greater difference in time to  
185 complete Part B compared to Part A indicates slower cognitive set shifting and therefore lower cognitive  
186 set shifting ability.

187

188 **3.4 Overall cognitive ability.** The Montreal Cognitive Assessment (MoCA, [www.mocatest.org](http://www.mocatest.org)) was  
189 given as a rapid assessment of overall cognitive ability that assesses cognitive domains including  
190 executive function, attention, and memory (Nasreddine et al., 2005). Participants also self-reported the  
191 number of years of education. These data were collected as potential covariates so we could test  
192 whether overall cognitive ability confounds more specific associations to cognitive set shifting and were  
193 not considered for exclusion, as a range of cognitive abilities was necessary to achieve the goals of this  
194 study.

195

196 **3.5 Perturbations.** Participants were exposed to 48 translational support-surface perturbations of  
197 unpredictable timing, direction, and magnitude using a custom perturbation platform (Payne et al.,  
198 2019a). Perturbations were evenly divided between forward and backward directions, and three  
199 perturbation magnitudes, which will be referred to as small, medium, and large. The small perturbation  
200 (0.15 g, 11.1 cm/s, 5.1 cm) was identical across participants. Medium (0.21-0.22 g, 15.2-16.1 cm/s, 7.0-  
201 7.4 cm) and large (0.26-0.29 g, 19.1-21.0 cm/s, 8.9-9.8 cm) perturbations were linearly scaled down  
202 from reference magnitudes (medium: 0.22 g, 16.7 cm/s, 7.7 cm; large: 0.30 g, 21.8 cm/s, 10.2 cm) by  
203 multiplying perturbation acceleration, velocity, and displacement characteristics by a scaling factor  
204 linearly related to the participant's height (Equation 1) to account for the effect of participant height and  
205 deliver perturbations that are mechanically similar across body sizes (Payne et al., 2019a). The 48  
206 perturbation series was divided into 8 blocks, each containing one replicate of each unique  
207 perturbation. Three different block-randomized perturbation orders were used across participants to



208 randomize any possible effects of trial order. The perturbations for an example participant are shown in  
 209 Figure 1.  
 210

211 
$$\text{Perturbation Scaling Factor} = \frac{\text{height} + 80 \text{ cm}}{280 \text{ cm}}$$

212  
 213 Participants were instructed to cross their arms across their chest, focus their vision on a fixed  
 214 location at eye-level approximately 4.5 meters away, and to try to recover balance without taking a  
 215 step. The experimenter monitored continuous electromyography (EMG) and electroencephalography  
 216 (EEG) activity to ensure activity had returned to quiet baseline levels prior to the onset of the next  
 217 perturbation. Seated rest breaks were taken after 15 minutes of perturbations, or more frequently at the  
 218 request of the participant or if the participant displayed signs of fatigue or loss of concentration.  
 219 Excluding rest breaks, inter-trial-intervals, from perturbation onset to perturbation onset were  $23 \pm 11$  s.  
 220 Trials in which participants took steps (8% of all trials) were excluded from analysis.  
 221

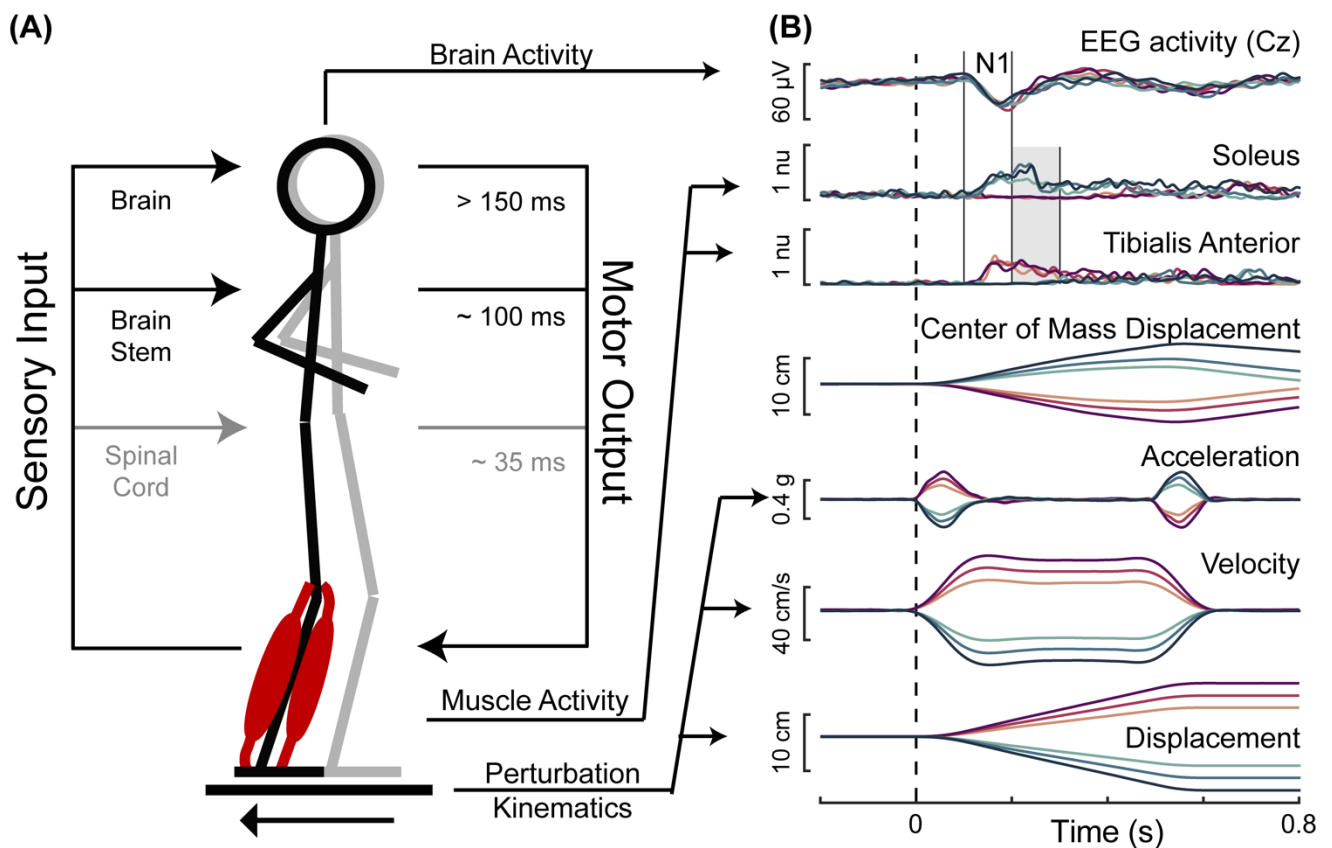

222  
 223 **Figure 1.** Balance perturbations. (A) The translational support-surface balance perturbation is depicted  
 224 along with a schematic displaying hierarchical levels of control of the perturbation-evoked muscle  
 225 activity. (B) Perturbation kinematics and the measured response variables are shown for an example  
 226 participant with forward movements of the floor represented in magentas and backward movements of  
 227 the floor represented in blues, with darker colors for larger perturbations. Perturbation onset is indicated  
 228 with the dashed vertical line. Solid vertical lines indicate the time window of 100-200 ms, in which the  
 229 cortical N1 and the early phase of muscle activity were assessed. The shaded gray area indicates the  
 230 time window of 200-300 ms, in which the late phase of muscle activity was assessed.  
 231

232 **3.6 Body motion.** Motion of the body's center of mass was tracked using a 10-camera Vicon Nexus 3D  
 233 motion analysis system. Reflective markers placed on areas of the body including the head, neck, hips,  
 234 knees, ankles, and feet were used to create a model of the body, and Vicon's plug-in-gait model was  
 235 used to estimate the body's center of mass. Body motion was referenced to motion of the support-

236 surface to assess the deviation of the center of mass from the base of support. Body motion was then  
237 quantified for each participant in each trial type as the peak deviation of the center of mass from the  
238 base of support along the axis of perturbation motion in data averaged across perturbations for each  
239 direction and magnitude.

240  
241 **3.7 Muscle activity.** Surface EMGs (Motion Lab Systems, Baton Rouge, LA) were collected from  
242 tibialis anterior and soleus muscles, which are an agonist-antagonist pair of ankle muscles activated in  
243 forward and backward support-surface perturbations. EMG activity was collected using silver silver-  
244 chloride bipolar electrodes with 2 cm interelectrode spacing (Norotrode 20, Myotronics, Inc.) and  
245 sampled at 1000 Hz after an online analog 500 Hz low-pass filter. Skin was scrubbed with alcohol  
246 swabs and shaved if necessary prior to electrode placement.

247 Muscle activity was epoched into 2.4 second intervals, beginning 400 ms before perturbation  
248 onset. Epochs were 35 Hz high-pass filtered with a third-order zero-lag Butterworth filter, mean-  
249 subtracted, half-wave rectified, and then 40 Hz low-pass filtered. To avoid issues with normalization  
250 that could occur when averaging muscle activity across the left and right legs, only the muscle activity  
251 for the left leg was analyzed. As only nonstepping behaviors were analyzed in forward and backward  
252 perturbations, muscle activity is expected to be similar across left and right legs.

253 Muscle activity was assessed in two time bins of interest. This included an early (100-200 ms)  
254 time bin, which is expected to primarily contain involuntary brainstem-mediated activity, and a late (200-  
255 300 ms) time bin, in which cortical contributions to muscle activation can appear (Figure 1).

256 Antagonist muscle activation was quantified relative to agonist muscle activity (Lang et al.,  
257 2019) within each perturbation magnitude as a measure of directional specificity, or motor set shifting,  
258 in terms of how the same muscle is activated differently across perturbation directions. EMG activity for  
259 each muscle was averaged within each time bin for each of the perturbation magnitudes and directions.  
260 Then, EMG activity was quantified according to Equation 2, which takes the absolute value of the  
261 difference in EMG activity between forward and backward perturbation directions (i.e., agonist activity -  
262 antagonist activity) and divides it by the larger of the two values (i.e., agonist activity). This results in a  
263 value between 0 and 1, where values near 1 indicate nearly exclusive agonist activity, or high  
264 directional specificity, and values near zero indicate nearly identical agonist and antagonist activity, or  
265 low directional specificity.

266  
267 
$$\text{Specificity} = \frac{|EMG(\text{forward}) - EMG(\text{backward})|}{\max [EMG(\text{forward}), EMG(\text{backward})]}$$
  
268  
269 
$$= \frac{\text{agonistEMG} - \text{antagonistEMG}}{\text{agonistEMG}}$$

270  
271  
272 **3.8 Cortical activity.** Electroencephalography (EEG) data were collected during the perturbation series  
273 using thirty-two active electrodes (ActiCAP, Brain Products, Germany) placed according to the  
274 international 10-20 system, with the exception of two electrodes placed on the skin over the mastoid  
275 bones behind the ears for offline re-referencing. The electrodes were prepared with conductive  
276 electrode gel (SuperVisc 100 gr. HighViscosity Electrolyte-Gel for active electrodes, Brain Products)  
277 using a blunt-tipped needle, which was also used to rub the scalp to improve signal quality.  
278 Impedances for the Cz and mastoid electrodes were generally below 10 kOhm before the start of data  
279 collection.

280 To subtract vertical eye movement and blink artifacts, electrooculography (EOG) data were  
281 collected with bipolar passive electrodes (E220x, brain Products) vertically bisecting the right pupil and  
282 referenced to the forehead. Prior to placement, the EOG electrodes were prepared with high-chloride  
283 abrasive gel (ABRALYT HiCl 250 gr., High-chloride-10% abrasive electrolyte gel, Brain Products) and  
284 the skin was scrubbed with an alcohol swab. EEG and EOG data were sampled at 1000 Hz on an  
285 ActiCHamp amplifier (Brain Products) with a 24-bit A/D converter and an online 20 kHz anti-aliasing  
286 low-pass filter.

287 EEG data were 1 Hz high-pass filtered offline with a third-order zero-lag Butterworth filter,  
288 mean-subtracted within channels, and then low-pass filtered at 25 Hz. Data at the Cz electrode were  
289 re-referenced to the average of the two mastoid electrodes and epoched into 2.4 s segments beginning  
290 400 ms before perturbation onset. EOG data were similarly filtered and segmented without re-  
291 referencing. The Gratton and Coles (Gratton et al., 1983) algorithm was applied as described in Payne  
292 et al. (Payne et al., 2019a) to remove blinks and eye movement artifacts through a serial regression-  
293 subtraction approach. Cz epochs were then averaged across trials within each trial type and baseline  
294 subtracted using a baseline period of 50-150 ms before perturbation onset. Cortical N1 response  
295 amplitudes were then quantified as the negative of the most negative amplitude ( $\mu\text{V}$ , such that higher  
296 values indicate a larger component peak) at the Cz electrode between 100-200 ms after perturbation  
297 onset (Figure 1).

298  
299 **3.9 Statistical analyses.** Simple linear regressions were used to test for associations between pairs of  
300 study variables. Specifically, linear regressions were used to test set shifting ability scores as a  
301 predictor of: N1 amplitudes, peak center of mass displacements, and directional specificity of soleus  
302 and tibialis anterior muscle activity. Additional linear regressions were used to test each of these  
303 variables as a predictor of MiniBESTest scores. Variables that were not normally distributed as  
304 determined by Shapiro-Wilk test  $p$ -values  $< 0.05$  were transformed to a normal distribution prior to  
305 regression using `boxcox.m` in MATLAB. Parameter estimates for the regression slopes were compared  
306 against the hypothesized value 0 with two-sided  $t$ -tests using PROC GLM in SAS. Figures display  
307 untransformed data with  $p$ -values and  $R^2$  values obtained from the adjusted variables.

308 All tests for association with N1 amplitudes and peak center of mass motion were performed  
309 separately across the two perturbation directions and three perturbation magnitudes, and tests for  
310 association with EMG activity were performed separately across the three perturbation magnitudes.  
311 Associations were examined for consistency across testing conditions via visual inspection of  
312 regression plots and tabulated regression coefficients. Simple linear regressions that yielded significant  
313 associations were further tested for robustness to potential confounding variables, including age, sex,  
314 height, weight, overall cognition scores, years of education, and balance ability scores. Specifically,  
315 each significant regression was retested in a multivariate regression with each of the potential  
316 confounding variables added, one at a time, as an additional predictor in the model to confirm that the  
317 associations were insensitive to adjustment by the potential confound.

## 318 319 4. RESULTS

320  
321 **Table 1.** Participant characteristics.

|                                     |              |
|-------------------------------------|--------------|
| N                                   | 19           |
| Sex                                 | 6F, 13M      |
| Age                                 | $71 \pm 7$   |
| Height (cm)                         | $175 \pm 10$ |
| Weight (kg)                         | $79 \pm 16$  |
| Trail Making Test (part A, seconds) | $24 \pm 8$   |
| Trail Making Test (part B, s)       | $61 \pm 25$  |
| Set Shifting (part B-A, s)          | $37 \pm 20$  |
| Overall Cognition (MoCA, /30)       | $26 \pm 3$   |
| Years of Education                  | $17 \pm 2$   |
| Balance Ability (miniBESTest, /28)  | $25 \pm 2$   |

322 Demographic characteristics of the participants are shown in Table 1. Overall, participants had high  
323 clinical balance ability and cognitive set shifting ability. On the clinical balance test, most participants  
324 scored above the fall-risk threshold of 23 for adults between 70-80 years old (Magnani et al., 2020)



326 (Figure 2). Similarly, most participants performed better on the Trail Making Test (B-A) than the  
327 average of 46 s that would be expected for adults between 70-80 years old with 12+ years of education  
328 (Tombaugh, 2004). Clinical balance ability scores were not associated with any other study variable.  
329 Specifically, miniBESTest scores were not associated with cognitive set shifting ( $p=0.26$ , Figure 2), the  
330 peak amplitude of center of mass displacement ( $p>0.12$  across all perturbation magnitudes directions),  
331 antagonist activity of the soleus (all  $p>0.078$ ), or tibialis anterior (all  $p>0.50$ ), or the peak amplitude of  
332 the cortical N1 response (all  $p>0.57$ ).  
333

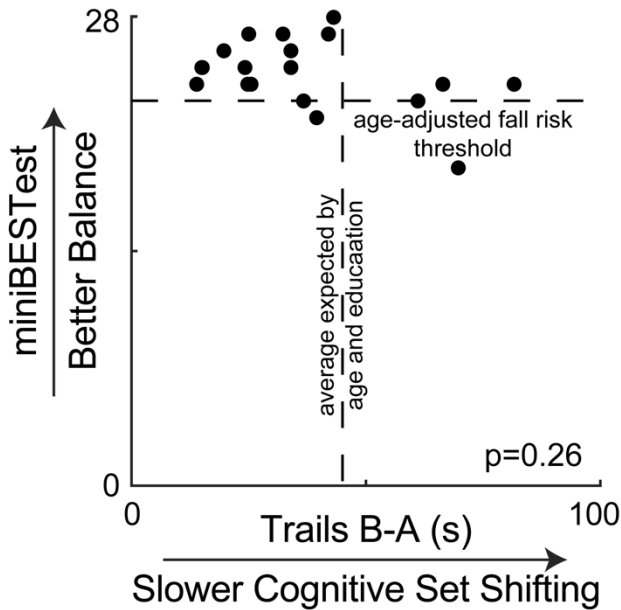

334  
335  
336 **Figure 2.** Clinical balance scores are plotted against cognitive set shifting performance, showing no  
337 association. Most participants scored above the suggested fall risk cutoff score of 23 for people  
338 between 70-80 years old on the miniBESTest (Magnani et al., 2020). Most participants also completed  
339 the Trail Making Test (B-A) faster than the average of 46 seconds that would be expected by their age  
340 and education from normative data (Tombaugh, 2004).  
341

342 Lower cognitive set shifting ability was associated with stiffer responses to perturbations (Figure 3).  
343 Specifically, individuals who took longer to complete the cognitive set shifting task had smaller peak  
344 amplitudes of center of mass displacement with respect to the base of support in all perturbation  
345 magnitudes in both perturbation directions (forward perturbations: small  $p=0.002$   $R^2=0.44$ , medium  
346  $p=0.001$   $R^2=0.48$ , large  $p=0.003$   $R^2=0.42$ ; backward perturbations: small  $p<0.001$   $R^2=0.49$ , medium  
347  $p<0.001$   $R^2=0.52$ , large  $p<0.001$   $R^2=0.66$ ). Set shifting ability scores remained a significant predictor of  
348 center of mass displacement in all perturbation magnitudes and directions when potential confounding  
349 variables of age, sex, height, weight, overall cognition, education, and balance ability scores were  
350 included in the models (Supplemental).  
351

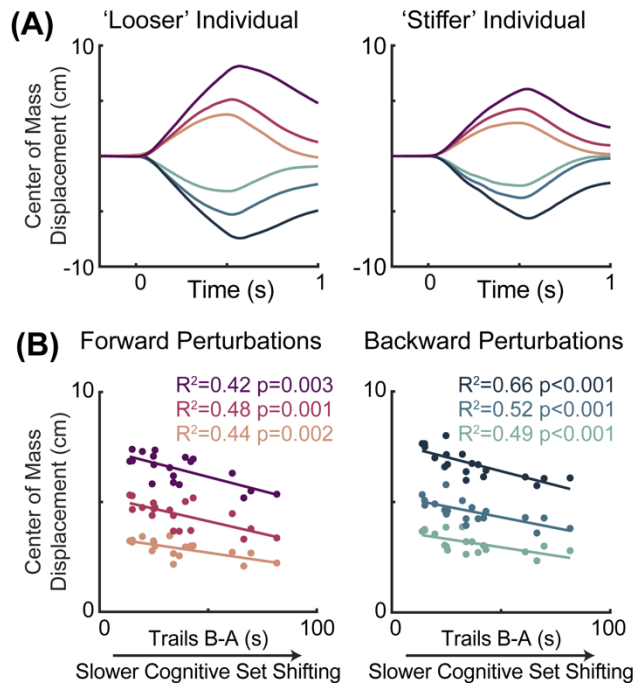

352  
 353 **Figure 3.** Slower cognitive set shifting was associated with stiffer behavioral responses to perturbation.  
 354 **(A)** Center of mass displacements are shown for a looser individual (left) and a stiffer individual (right)  
 355 for each of the perturbation types, with forward movements of the floor (resulting in backward leaning  
 356 posture) represented in magentas and backward movements of the floor represented in blues, with  
 357 darker colors for larger perturbations. **(B)** Peak center of mass displacements are plotted against  
 358 cognitive set shifting scores for forward (left) and backward (right) perturbations for each perturbation  
 359 magnitude.

360  
 361 Lower cognitive set shifting ability was associated with more antagonist activity in the late phase (200-  
 362 300 ms) of soleus muscle activation (Figure 4). Specifically, individuals who took longer to complete the  
 363 cognitive set shifting task displayed less directional specificity of late phase (200-300 ms) soleus  
 364 activity (small perturbation  $p=0.010$ ,  $R^2=0.33$ , medium  $p=0.007$ ,  $R^2=0.35$ , large  $p=0.004$   $R^2=0.39$ ). Set  
 365 shifting ability scores remained a significant predictor of directional specificity of late phase soleus  
 366 activity in all perturbation magnitudes when potential confounding variables of age, sex, height, weight,  
 367 overall cognition, education, and balance ability scores were included in the models (Supplemental). In  
 368 contrast, set shifting ability was not associated with directional specificity of the early automatic phase  
 369 (100-200 ms) of soleus muscle activation (small perturbation  $p=0.12$ , medium  $p=0.41$ , large  $p=0.16$ ).

370  
 371 Limited associations between cognitive set shifting ability and tibialis anterior muscle activity (Figure 4)  
 372 were not robust to the inclusion of potential confounding variables. Specifically, individuals who took  
 373 longer to complete the cognitive set shifting task displayed lower directional specificity of late phase  
 374 (200-300 ms) tibialis anterior muscle activation in medium ( $p=0.018$   $R^2=0.29$ ) and large ( $p=0.030$   
 375  $R^2=0.25$ ) perturbations, but only a trend was observed in small ( $p=0.068$ ) perturbations. However,  
 376 these associations were not robust to the inclusion of potential confounding variables (Supplemental).  
 377 Specifically, set shifting scores were no longer a significant predictor of directional specificity of late  
 378 phase tibialis anterior muscle activation in the medium perturbation magnitude upon the inclusion of sex  
 379 ( $p=0.053$ ) or overall cognition ( $p=0.096$ ) into the model, and significance was similarly lost in the large  
 380 perturbation magnitude upon the inclusion of height ( $p=0.058$ ), sex ( $p=0.11$ ), or overall cognition  
 381 ( $p=0.077$ ) into the model. Set shifting ability scores were not significant predictors of directional  
 382 specificity of the early automatic phase (100-200 ms) of tibialis anterior muscle activation (small  
 383 perturbation  $p=0.61$ , medium  $p=0.24$ , large  $p=0.38$ ).

384

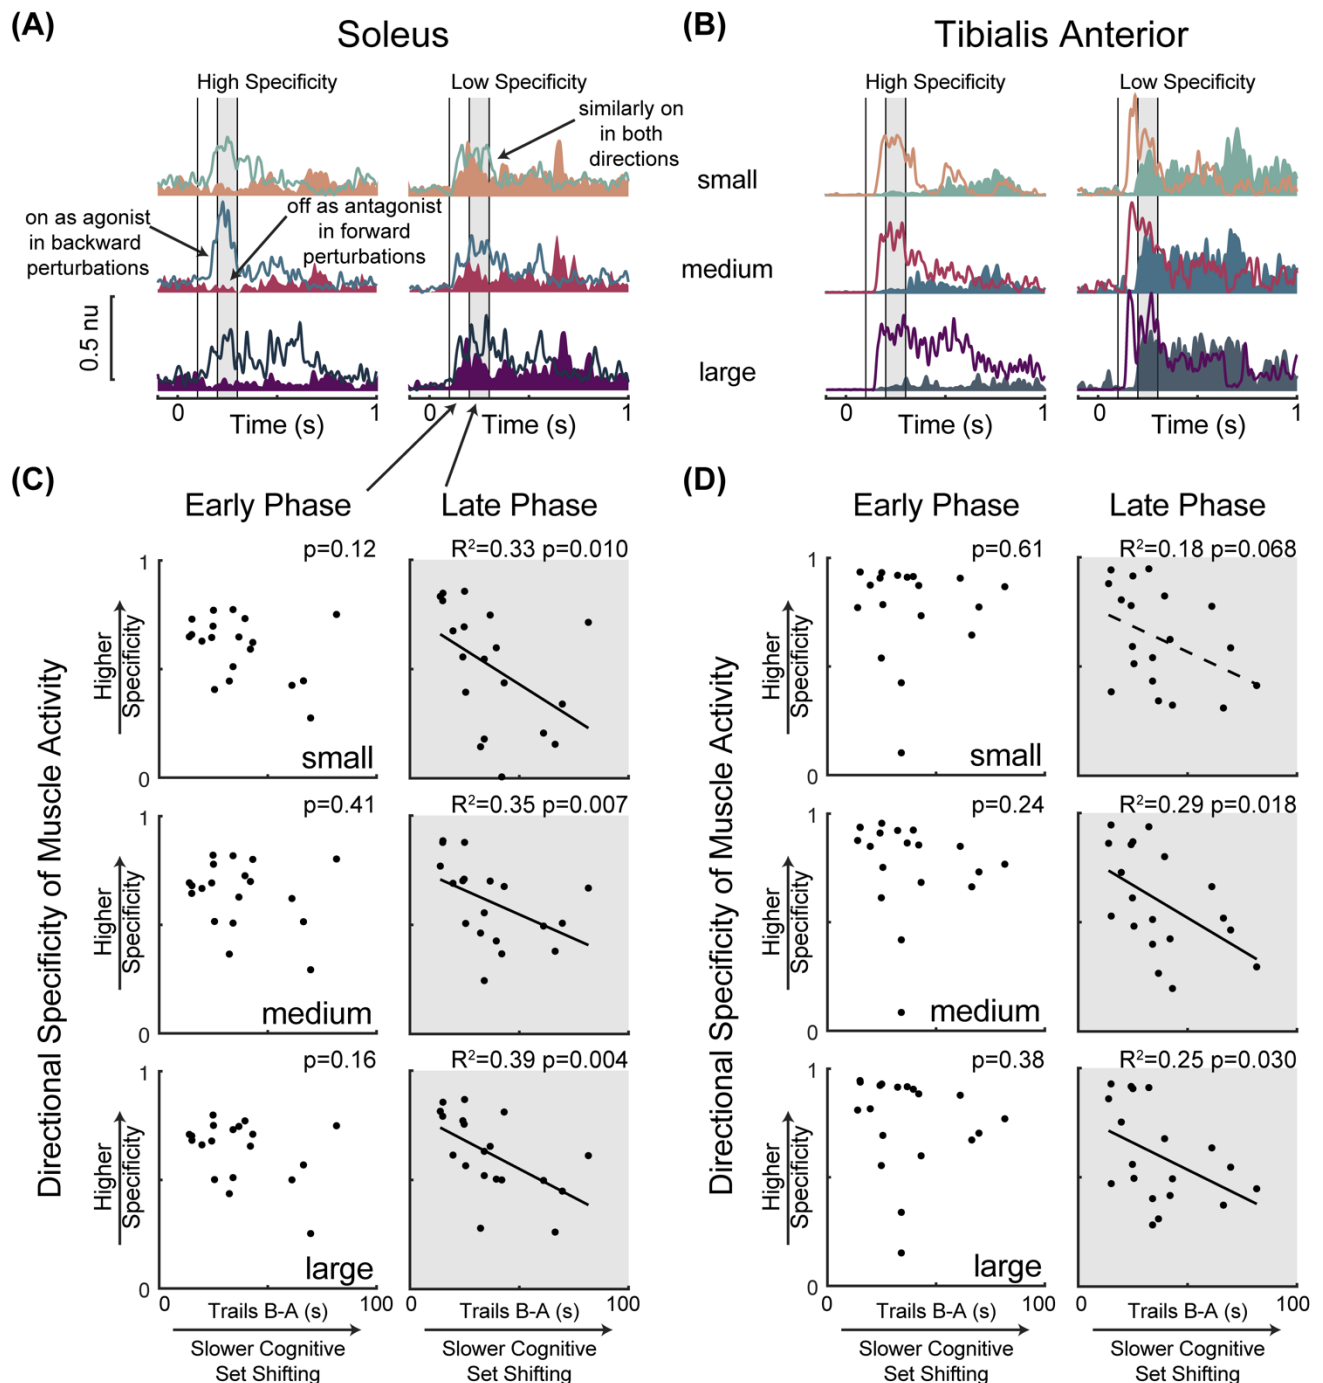

385  
 386 **Figure 4.** Slower cognitive set shifting was associated with lower directional specificity in the late phase  
 387 of muscle activation. Condition-averaged muscle activity is shown for **(A)** soleus and **(B)** tibialis anterior  
 388 muscles for example participants with higher or lower directional specificity scores. Muscle activity  
 389 evoked by forward movements of the floor (resulting in backward leaning posture) is represented in  
 390 magentas and activity evoked by backward movements of the floor is represented in blues, with darker  
 391 colors for larger perturbations. Antagonist activity (i.e., soleus activity in forward perturbations and  
 392 tibialis anterior activity in backward perturbations) is shaded for clarity. Vertical lines at 100 ms, 200 ms,  
 393 and 300 ms mark the bounds of the time bins of interest. The later (200-300 ms) time bin is shaded in  
 394 all panels. Directional specificity is plotted against cognitive set shifting scores for the **(C)** soleus muscle  
 395 and **(D)** tibialis anterior muscle in each perturbation magnitude for early (100-200 ms) and late (200-300  
 396 ms) time bins.

397  
398 Lower cognitive set shifting ability was associated with larger perturbation evoked cortical N1  
399 responses (Figure 5). Specifically, individuals who took longer to complete the cognitive set shifting  
400 task had larger cortical N1 peak amplitudes in response to all perturbation magnitudes in both  
401 perturbation directions (forward perturbations: small  $p=0.004$   $R^2=0.40$ , medium  $p=0.002$   $R^2=0.44$ , large  
402  $p=0.003$   $R^2=0.41$ ; backward perturbations: small  $p<0.001$   $R^2=0.60$ , medium  $p=0.004$   $R^2=0.39$ , large  
403  $p=0.016$   $R^2=0.30$ ). Set shifting ability scores remained a significant predictor of N1 peak amplitudes in  
404 all perturbation magnitudes and directions when potential confounding variables of age, sex, height,  
405 weight, overall cognition, education, and balance ability scores were included in the models, with one  
406 exception (Supplemental). This exception was in large backward perturbations, where set shifting ability  
407 fell below significance as a predictor of N1 amplitudes upon inclusion of sex into the model ( $p=0.055$ ).  
408

**(A) Example Cortical N1 Responses**

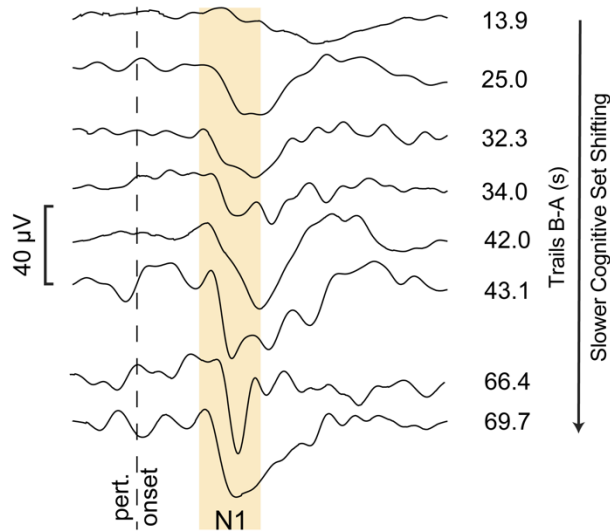

**(B)**

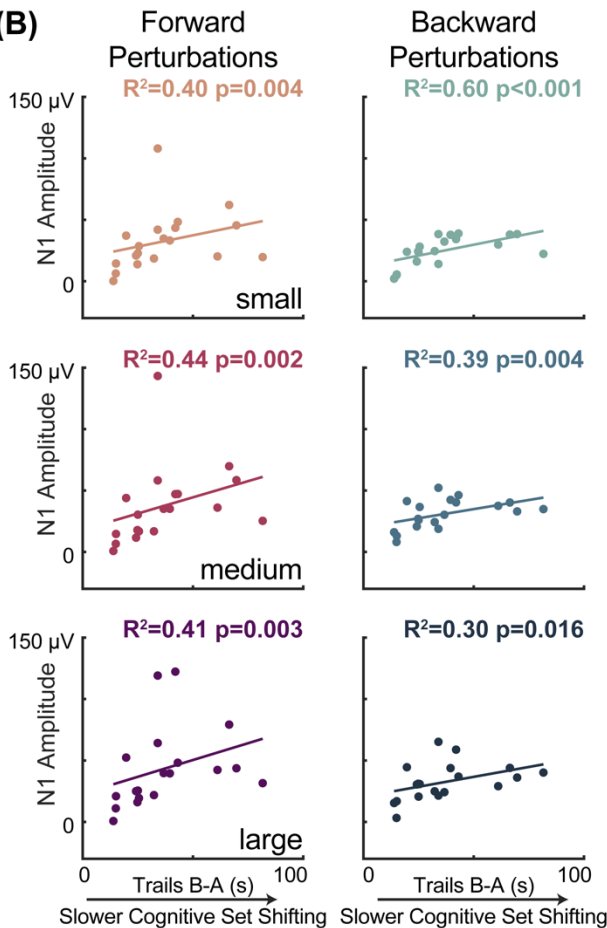

409  
 410 **Figure 5.** Slower cognitive set shifting was associated with larger perturbation-evoked cortical N1  
 411 responses. **(A)** Cortical responses are shown at the Cz electrode for eight different participants  
 412 (averages across all trials) as examples along with their set shifting scores. The gold box highlights the  
 413 window of 100-200 ms, in which the N1 amplitude was quantified. **(B)** Cortical N1 response amplitudes  
 414 are plotted against cognitive set shifting scores in each of the perturbation conditions. Forward  
 415 movements of the floor (resulting in backward leaning posture) are represented in magentas and  
 416 backward movements of the floor are represented in blues, with darker colors for larger perturbations.



417  
418  
419  
420  
421  
422  
423  
424  
425  
426  
427  
428  
429  
430  
431  
432  
433  
434  
435  
436  
437  
438  
439  
440  
441  
442  
443  
444  
445  
446  
447  
448  
449  
450  
451  
452  
453  
454  
455  
456  
457  
458  
459  
460  
461  
462  
463  
464  
465  
466  
467  
468  
469

## 5. DISCUSSION

Our results suggest that cortically-mediated reactions to a balance disturbance may share common mechanisms with cognitive set shifting ability in older adults with relatively high balance ability. While prior studies have linked set shifting impairments to severe balance dysfunction and frequent falls (Herman et al., 2010; Tangen et al., 2014; McKay et al., 2018), our results demonstrate that set shifting ability is expressed in successful balance recovery behavior even in the absence of profound clinical balance disability. Individuals with lower cognitive set shifting ability had stiffer whole-body behavior after balance perturbations, which may be caused by excessive agonist-antagonist coactivation related to difficulty incorporating the directional context into the cortically-mediated phase of the motor response. The associations between cognitive set shifting and the late phase of the motor response as well as the larger cortical N1 responses both suggest that cognitive set shifting shares common mechanisms with the cortically-mediated reaction to the perturbation, rather than cortical preparatory activity, which would have been observed in the early phase of the motor response. The associations between balance and cognitive set shifting cannot be explained by age, as all associations remained significant when accounting for age. Our data suggest that cognitive set shifting ability may indicate variation in balance control that is not yet detectable in the clinical balance test, but it remains to be tested whether cognitive set shifting ability could serve as an earlier predictor of falls in preclinical populations. Earlier detection of changes in balance control could enable treatment when these changes are more amenable to adaptation (Zaback et al., 2019). Further, new therapeutic targets for rehabilitation could be identified if there are causal links between the engagement of cortical resources and the subsequent antagonist muscle activity, which would need to be tested with methods that disrupt the cortical activity to influence balance and cognitive set shifting behavior. These findings warrant further investigation of cortical engagement in balance recovery behavior guided by cognitive set shifting ability rather than just clinical balance ability, which may help explain why balance rehabilitation can be enhanced by cognitive training (Hagovska and Olekszyova, 2016).

These findings suggest that cognitive set shifting ability is expressed in balance recovery behavior earlier than previously suggested. The clinical balance test (Balance Evaluation Systems Test, or BESTest, later shortened to the miniBESTest) was designed to distinguish between levels of balance function and fall risk in people seeking treatment for balance-related disability (Horak et al., 2009; Franchignoni et al., 2010). The miniBESTest was not designed to measure subtle differences in balance recovery behavior in preclinical balance function, which may explain why we did not find associations between clinical balance ability and any other variable in the present study. By assessing more precise neuromechanical metrics of balance control in response to balance destabilization, we found that cognitive set shifting ability was associated with stiffer balance recovery mechanics and antagonist muscle activity that were not observed in the clinical balance test. While the majority of our participants had a high level of balance function, we chose not to exclude people with mild cognitive impairment to allow for variation in cognitive function to relate to balance recovery behavior. Although our cognitive set shifting scores were typical given the age and relatively high level of education of our participant cohort (Giovagnoli et al., 1996; Tombaugh, 2004; Steinberg et al., 2005), this should not be misinterpreted as an indication that our participants are free of the cognitive decline that would be expected for their ages. Indeed, roughly a quarter of our participants (5 of 19) scored below the cutoff value for mild cognitive impairment on the Montreal Cognitive Assessment (Nasreddine et al., 2005). In any case, most of the observed associations between cognitive set shifting and perturbation-evoked balance recovery behavior remained significant when accounting for age, education, overall cognition, and most of the other potentially confounding variables considered, indicating that our associations are specific to cognitive set shifting and not better explained by these other factors.

Difficulty shifting cognitive sets may extend to a related difficulty shifting motor sets in the cortically-mediated phase of balance recovery behavior. People with lower cognitive set shifting ability had stiffer whole-body mechanics as evidenced by less center of mass motion in response to balance

470 perturbations. While greater resistance to a balance disturbance would seem to suggest greater  
471 stability (Horak et al., 2005), the accompanying increase in antagonist activity, which is associated with  
472 clinical balance impairments (Lang et al., 2019), suggests this biomechanical stiffness does not reflect  
473 better balance control. Our directional specificity measure of antagonist activity was originally  
474 developed as a proxy measure for simultaneous cocontraction of agonist-antagonist muscle pairs that  
475 overcomes issues of comparing activity levels between muscles by instead comparing the activity of an  
476 individual muscle between agonist and antagonist contexts (Lang et al., 2019). However, because this  
477 measure compares the shift in activity of individual muscles between agonist and antagonist contexts, it  
478 could also be considered as a measure of motor set shifting. Directional specificity of the late phase of  
479 the soleus muscle was robustly associated with cognitive set shifting ability across perturbation  
480 magnitudes and robust to all potential confounds, but associations with the late phase of the tibialis  
481 anterior muscle were limited to larger perturbations and may be explained by lower overall cognition or  
482 female sex. While these muscles are a small fraction of the muscle activity contributing to the overall  
483 balance recovery behavior, our data provide evidence that difficulty shifting cognitive sets may extend  
484 to a related difficulty shifting motor sets between perturbation directions in the cortically-mediated  
485 phase of the motor response. A relationship between cognitive and motor set shifting is further  
486 supported by a recent finding that older adults with difficulty shifting cognitive sets had a related  
487 difficulty shifting between locomotor patterns on a split belt treadmill (Sombric and Torres-Oviedo,  
488 2021). Because the motor set shifting association was not observed in the early phase of the  
489 perturbation-evoked motor response, it is unlikely that the influence of pre-perturbation cognitive state,  
490 such as anticipation, readiness, or arousal, on the brainstem-mediated response has overlapping  
491 mechanisms with cognitive set shifting. The association of motor set shifting during the later cortically-  
492 mediated phase of the motor response suggests that instead the cortically-mediated reaction of the  
493 perturbation may have overlapping mechanisms with cognitive set shifting, which is further supported  
494 by the enhanced cortical N1 responses.

495  
496 Our findings suggest the cortical N1 has overlapping mechanisms with cognitive set shifting, and prior  
497 work linking the N1 to attention and perceived threat may help explain the subsequent antagonist  
498 activity. While prior studies have shown within-subjects changes in the cortical N1 with cognitive  
499 processes including attention (Quant et al., 2004b; Little and Woollacott, 2015), perceived threat (Adkin  
500 et al., 2008; Mochizuki et al., 2010), and predictability (Adkin et al., 2006; Adkin et al., 2008; Mochizuki  
501 et al., 2008; Mochizuki et al., 2010), we believe this is the first study to demonstrate an association to  
502 between-subjects differences in cognitive ability. Given that set shifting ability is reflected in the cortical  
503 activity (100-200 ms) prior to the muscle activity (200-300 ms), it is possible that the N1 reflects cortical  
504 activity contributing to the subsequent antagonist activity, which could be tested in future studies by  
505 modulating cortical activity through therapeutic noninvasive brain stimulation (Taube et al., 2006;  
506 Jacobs et al., 2009). For example, after the perturbation, the participant may perceive a high threat or  
507 need for attention, which is reflected in the cortical N1 (Quant et al., 2004b; Adkin et al., 2008;  
508 Mochizuki et al., 2010; Little and Woollacott, 2015), and subsequently engage a nonspecific  
509 cocontraction strategy that does not incorporate the directional context into the behavior. Indeed,  
510 people report paying more attention to balance under more threatening conditions (Huffman et al.,  
511 2009) and display greater stiffness of postural sway (Carpenter et al., 2001; Carpenter et al., 2004;  
512 Carpenter et al., 2006). Greater perceived threat or fear of falling is also associated with agonist-  
513 antagonist cocontraction in both younger and older adults (Okada et al., 2001; Carpenter et al., 2006).  
514 Further, habituation of agonist-antagonist cocontraction with practice in high threat conditions is  
515 associated with habituation of the emotional response (Zaback et al., 2019), which may be easier to  
516 modify than the abnormal involuntary behavior observed at more severe stages of balance impairment  
517 (McKay et al., 2021). We previously suggested that the cortical N1 could reflect compensatory cortical  
518 control based on larger amplitudes in young adults with lower balance ability (Payne and Ting, 2020a)  
519 and on trials with compensatory steps (Payne and Ting, 2020c). This nonspecific cocontraction could  
520 be another way in which compensatory cortical control is engaged. Although the supplementary motor

521 area has direct connections to motor neurons (Goldberg, 1985), potential connections between the  
522 cortical N1 and subsequent muscle activation also include indirect routes, such as through projections  
523 from the supplementary motor area to the motor cortex or basal ganglia (Goldberg, 1985). However,  
524 any causal links between the cortical N1 and balance recovery behavior remain speculative until tested  
525 by further studies, particularly through methods that would disrupt the cortical activity, such as  
526 noninvasive brain stimulation, or dual task interference, which reduces the N1 amplitude (Quant et al.,  
527 2004b; Little and Woollacott, 2015) and the late phase of the muscle activity (Rankin et al., 2000).  
528

529 Changes in prefrontal cortical activity in older adults may explain links between motor and cognitive  
530 behavior and may be a potential target for rehabilitation. Cognitive set shifting depends on the  
531 dorsolateral prefrontal cortex (Zgaljardic et al., 2006), and the cortical N1 has been localized to the  
532 supplementary motor area (Marlin et al., 2014; Mierau et al., 2015), but there are several potential  
533 explanations as to why cognitive set shifting would be associated with the cortical N1 response despite  
534 their distinct brain regions. First, older adults recruit prefrontal cortical areas to a greater extent and  
535 more broadly than young adults for the same tasks (Reuter-Lorenz and Cappell, 2008), and lose  
536 functional segregation between different cortical areas (Chen et al., 2011; Damoiseaux, 2017; Chong et  
537 al., 2019; Cassady et al., 2020), which may result in coupled activation between cognitive and motor  
538 cortical areas. Accordingly, older adults tend to recruit prefrontal cortical areas broadly for balance and  
539 walking tasks (Stuart et al., 2018; Nobrega-Sousa et al., 2020; St George et al., 2021). However, the  
540 cortical N1 may not arise exclusively from the supplementary motor area, as there is evidence to  
541 suggest that multiple cortical sources synchronize in the theta frequency band to contribute to the  
542 cortical N1 response even in young adults (Peterson and Ferris, 2018; 2019). Increased  
543 synchronization between prefrontal and motor cortical areas during balance recovery with aging may  
544 explain associations between cognitive function and balance control in older adults. For example, we  
545 recently showed that beta coherence between motor and prefrontal cortical areas during balance  
546 recovery in older adults is associated with cognitive dual task interference in walking (Palmer et al.,  
547 2021). A better understanding of the mechanisms linking balance and cognitive function in aging could  
548 reveal new therapeutic targets for rehabilitation and enable a more targeted exploration of the effects of  
549 cognitive training on balance rehabilitation (Smith-Ray et al., 2015; Hagovska and Olekszyova, 2016).  
550 For instance, it is well established that noninvasive stimulation of the dorsolateral prefrontal cortex can  
551 affect cognitive set shifting performance (Ko et al., 2008a; Ko et al., 2008b; Leite et al., 2011; Leite et  
552 al., 2013; Luthi et al., 2014; Gerrits et al., 2015; Tayeb and Lavidor, 2016; Imburgio and Orr, 2018; Leite  
553 et al., 2020), but similar stimulation protocols are rarely applied to impact balance function despite  
554 evidence that it can reduce cognitive dual task interference on balance and walking behaviors (Manor  
555 et al., 2018).  
556

557 **Funding Sources**

558  
559 This work was supported by the National Institutes of Health (Eunice Kennedy Shriver National Institute  
560 of Child Health & Human: R01 HD46922, F32 HD096816; National Institute of Neurological Disorders  
561 and Stroke: P50 NS 098685; National Center for Advancing Translational Sciences: UL1 TR000424),  
562 the Fulton County Elder Health Scholarship (2015 -2017), and the Zebrowitz Award (2018). The content  
563 is solely the responsibility of the authors and does not necessarily represent the official views of the  
564 National Institutes of Health or other funding agencies.

565  
566 **Respective Contributions**

567  
568 A.M.P. and L.H.T. conceived and designed the experiment, A.M.P. collected the data, performed all  
569 analyses, drafted and revised the manuscript and figures, J.A.P. and J.L.M. contributed to the data  
570 analysis, L.H.T. and J.A.P. contributed to the interpretation of results and manuscript revision, and all  
571 authors approved of the final manuscript.

572  
573  
574  
575

576 **REFERENCES**

- 577
- 578 Adkin, A.L., Campbell, A.D., Chua, R., and Carpenter, M.G. (2008). The influence of postural threat on  
579 the cortical response to unpredictable and predictable postural perturbations. *Neurosci Lett*  
580 435(2), 120-125. doi: 10.1016/j.neulet.2008.02.018.
- 581 Adkin, A.L., Quant, S., Maki, B.E., and McIlroy, W.E. (2006). Cortical responses associated with  
582 predictable and unpredictable compensatory balance reactions. *Exp Brain Res* 172(1), 85-93.  
583 doi: 10.1007/s00221-005-0310-9.
- 584 Burleigh, A., and Horak, F. (1996). Influence of instruction, prediction, and afferent sensory information  
585 on the postural organization of step initiation. *J Neurophysiol* 75(4), 1619-1628. doi:  
586 10.1152/jn.1996.75.4.1619.
- 587 Burleigh, A.L., Horak, F.B., and Malouin, F. (1994). Modification of postural responses and step  
588 initiation: evidence for goal-directed postural interactions. *J Neurophysiol* 72(6), 2892-2902. doi:  
589 10.1152/jn.1994.72.6.2892.
- 590 Carpenter, M.G., Adkin, A.L., Brawley, L.R., and Frank, J.S. (2006). Postural, physiological and  
591 psychological reactions to challenging balance: does age make a difference? *Age Ageing* 35(3),  
592 298-303. doi: 10.1093/ageing/af1002.
- 593 Carpenter, M.G., Frank, J.S., Adkin, A.L., Paton, A., and Allum, J.H. (2004). Influence of postural  
594 anxiety on postural reactions to multi-directional surface rotations. *J Neurophysiol* 92(6), 3255-  
595 3265. doi: 10.1152/jn.01139.2003.
- 596 Carpenter, M.G., Frank, J.S., Silcher, C.P., and Peysar, G.W. (2001). The influence of postural threat  
597 on the control of upright stance. *Exp Brain Res* 138(2), 210-218. doi: 10.1007/s002210100681.
- 598 Cassady, K., Ruitenber, M.F.L., Reuter-Lorenz, P.A., Tommerdahl, M., and Seidler, R.D. (2020).  
599 Neural Dedifferentiation across the Lifespan in the Motor and Somatosensory Systems. *Cereb*  
600 *Cortex* 30(6), 3704-3716. doi: 10.1093/cercor/bhz336.
- 601 Chen, Z.J., He, Y., Rosa-Neto, P., Gong, G., and Evans, A.C. (2011). Age-related alterations in the  
602 modular organization of structural cortical network by using cortical thickness from MRI.  
603 *Neuroimage* 56(1), 235-245. doi: 10.1016/j.neuroimage.2011.01.010.
- 604 Chong, J.S.X., Ng, K.K., Tandi, J., Wang, C., Poh, J.H., Lo, J.C., et al. (2019). Longitudinal Changes in  
605 the Cerebral Cortex Functional Organization of Healthy Elderly. *J Neurosci* 39(28), 5534-5550.  
606 doi: 10.1523/JNEUROSCI.1451-18.2019.
- 607 Damiano, D.L. (1993). Reviewing Muscle Cocontraction. *Phys Occup Ther Pediatr* 12(4), 3-20. doi:  
608 10.1080/J006v12n04\_02.
- 609 Damoiseaux, J.S. (2017). Effects of aging on functional and structural brain connectivity. *Neuroimage*  
610 160, 32-40. doi: 10.1016/j.neuroimage.2017.01.077.
- 611 Dietz, V., Quintern, J., and Sillem, M. (1987). Stumbling reactions in man: significance of proprioceptive  
612 and pre-programmed mechanisms. *J Physiol* 386, 149-163. doi:  
613 10.1113/jphysiol.1987.sp016527.
- 614 Duckrow, R.B., Abu-Hasaballah, K., Whipple, R., and Wolfson, L. (1999). Stance perturbation-evoked  
615 potentials in old people with poor gait and balance. *Clin Neurophysiol* 110(12), 2026-2032. doi:  
616 10.1016/S1388-2457(99)00195-9.
- 617 Franchignoni, F., Horak, F., Godi, M., Nardone, A., and Giordano, A. (2010). Using psychometric  
618 techniques to improve the Balance Evaluation Systems Test: the mini-BESTest. *J Rehabil Med*  
619 42(4), 323-331. doi: 10.2340/16501977-0537.
- 620 Gerrits, N.J.H.M., van den Heuvel, O.A., and van der Werf, Y.D. (2015). Decreased neural activity and  
621 neural connectivity while performing a set-shifting task after inhibiting repetitive transcranial  
622 magnetic stimulation on the left dorsal prefrontal cortex. *BMC Neurosci* 16, 45. doi:  
623 10.1186/s12868-015-0181-3.
- 624 Giovagnoli, A.R., Del Pesce, M., Mascheroni, S., Simoncelli, M., Laiacona, M., and Capitani, E. (1996).  
625 Trail making test: normative values from 287 normal adult controls. *Ital J Neurol Sci* 17(4), 305-  
626 309. doi: 10.1007/BF01997792.



- 627 Gleason, C.E., Gangnon, R.E., Fischer, B.L., and Mahoney, J.E. (2009). Increased risk for falling  
628 associated with subtle cognitive impairment: secondary analysis of a randomized clinical trial.  
629 *Dement Geriatr Cogn Disord* 27(6), 557-563. doi: 10.1159/000228257.
- 630 Goldberg, G. (1985). Supplementary motor area structure and function: review and hypotheses. *The*  
631 *Behavioral and Brain Sciences* 8, 567-616.
- 632 Gratton, G., Coles, M.G., and Donchin, E. (1983). A new method for off-line removal of ocular artifact.  
633 *Electroencephalogr Clin Neurophysiol* 55(4), 468-484. doi: 10.1016/0013-4694(83)90135-9.
- 634 Hagovska, M., and Olekszyova, Z. (2016). Impact of the combination of cognitive and balance training  
635 on gait, fear and risk of falling and quality of life in seniors with mild cognitive impairment.  
636 *Geriatr Gerontol Int* 16(9), 1043-1050. doi: 10.1111/ggi.12593.
- 637 Harris, P.A., Taylor, R., Minor, B.L., Elliott, V., Fernandez, M., O'Neal, L., et al. (2019). The REDCap  
638 consortium: Building an international community of software platform partners. *J Biomed Inform*  
639 95, 103208. doi: 10.1016/j.jbi.2019.103208.
- 640 Harris, P.A., Taylor, R., Thielke, R., Payne, J., Gonzalez, N., and Conde, J.G. (2009). Research  
641 electronic data capture (REDCap)--a metadata-driven methodology and workflow process for  
642 providing translational research informatics support. *J Biomed Inform* 42(2), 377-381. doi:  
643 10.1016/j.jbi.2008.08.010.
- 644 Henry, S.M., Fung, J., and Horak, F.B. (1998). EMG responses to maintain stance during  
645 multidirectional surface translations. *J Neurophysiol* 80(4), 1939-1950. doi:  
646 10.1152/jn.1998.80.4.1939.
- 647 Herman, T., Mirelman, A., Giladi, N., Schweiger, A., and Hausdorff, J.M. (2010). Executive control  
648 deficits as a prodrome to falls in healthy older adults: a prospective study linking thinking,  
649 walking, and falling. *J Gerontol A Biol Sci Med Sci* 65(10), 1086-1092. doi:  
650 10.1093/gerona/gkq077.
- 651 Horak, F.B., Diener, H.C., and Nashner, L.M. (1989). Influence of central set on human postural  
652 responses. *J Neurophysiol* 62(4), 841-853. doi: 10.1152/jn.1989.62.4.841.
- 653 Horak, F.B., Dimitrova, D., and Nutt, J.G. (2005). Direction-specific postural instability in subjects with  
654 Parkinson's disease. *Exp Neurol* 193(2), 504-521. doi: 10.1016/j.expneurol.2004.12.008.
- 655 Horak, F.B., and Nashner, L.M. (1986). Central programming of postural movements: adaptation to  
656 altered support-surface configurations. *J Neurophysiol* 55(6), 1369-1381. doi:  
657 10.1152/jn.1986.55.6.1369.
- 658 Horak, F.B., Wrisley, D.M., and Frank, J. (2009). The Balance Evaluation Systems Test (BESTest) to  
659 differentiate balance deficits. *Phys Ther* 89(5), 484-498. doi: 10.2522/ptj.20080071.
- 660 Huffman, J.L., Horslen, B.C., Carpenter, M.G., and Adkin, A.L. (2009). Does increased postural threat  
661 lead to more conscious control of posture? *Gait Posture* 30(4), 528-532. doi:  
662 10.1016/j.gaitpost.2009.08.001.
- 663 Imburgio, M.J., and Orr, J.M. (2018). Effects of prefrontal tDCS on executive function: Methodological  
664 considerations revealed by meta-analysis. *Neuropsychologia* 117, 156-166. doi:  
665 10.1016/j.neuropsychologia.2018.04.022.
- 666 Jacobs, J.V., and Horak, F.B. (2007a). Cortical control of postural responses. *J Neural Transm (Vienna)*  
667 114(10), 1339-1348. doi: 10.1007/s00702-007-0657-0.
- 668 Jacobs, J.V., Lou, J.S., Kraakevik, J.A., and Horak, F.B. (2009). The supplementary motor area  
669 contributes to the timing of the anticipatory postural adjustment during step initiation in  
670 participants with and without Parkinson's disease. *Neuroscience* 164(2), 877-885. doi:  
671 10.1016/j.neuroscience.2009.08.002.
- 672 Ko, J.H., Monchi, O., Ptito, A., Bloomfield, P., Houle, S., and Strafella, A.P. (2008a). Theta burst  
673 stimulation-induced inhibition of dorsolateral prefrontal cortex reveals hemispheric asymmetry in  
674 striatal dopamine release during a set-shifting task: a TMS-[(11)C]raclopride PET study. *Eur J*  
675 *Neurosci* 28(10), 2147-2155. doi: 10.1111/j.1460-9568.2008.06501.x.
- 676 Ko, J.H., Monchi, O., Ptito, A., Petrides, M., and Strafella, A.P. (2008b). Repetitive transcranial  
677 magnetic stimulation of dorsolateral prefrontal cortex affects performance of the wisconsin card  
678 sorting task during provision of feedback. *Int J Biomed Imaging* 2008, 143238. doi:  
679 10.1155/2008/143238.

- 680 Koch, I., Gade, M., Schuch, S., and Philipp, A.M. (2010). The role of inhibition in task switching: a  
681 review. *Psychon Bull Rev* 17(1), 1-14. doi: 10.3758/PBR.17.1.1.
- 682 Lang, K.C., Hackney, M.E., Ting, L.H., and McKay, J.L. (2019). Antagonist muscle activity during  
683 reactive balance responses is elevated in Parkinson's disease and in balance impairment. *PLoS*  
684 *One* 14(1), e0211137. doi: 10.1371/journal.pone.0211137.
- 685 Leite, J., Carvalho, S., Fregni, F., Boggio, P.S., and Goncalves, O.F. (2013). The effects of cross-  
686 hemispheric dorsolateral prefrontal cortex transcranial direct current stimulation (tDCS) on task  
687 switching. *Brain Stimul* 6(4), 660-667. doi: 10.1016/j.brs.2012.10.006.
- 688 Leite, J., Carvalho, S., Fregni, F., and Goncalves, O.F. (2011). Task-specific effects of tDCS-induced  
689 cortical excitability changes on cognitive and motor sequence set shifting performance. *PLoS*  
690 *One* 6(9), e24140. doi: 10.1371/journal.pone.0024140.
- 691 Leite, J., Gonçalves, Ó.F., and Carvalho, S. (2020). Task switching ability is compromised after cross-  
692 hemispheric tDCS over the parietal cortex. *Principles and Practice of Clinical Research Journal*  
693 6(3), 42-47. doi: 10.21801/ppcrj.2020.63.5.
- 694 Little, C.E., and Woollacott, M. (2015). EEG measures reveal dual-task interference in postural  
695 performance in young adults. *Exp Brain Res* 233(1), 27-37. doi: 10.1007/s00221-014-4111-x.
- 696 Lundin-Olsson, L., Nyberg, L., and Gustafson, Y. (1997). "Stops walking when talking" as a predictor of  
697 falls in elderly people. *The Lancet* 349, 617.
- 698 Luthi, M., Henke, K., Gutbrod, K., Nyffeler, T., Chaves, S., and Muri, R.M. (2014). In your eyes only:  
699 deficits in executive functioning after frontal TMS reflect in eye movements. *Front Behav*  
700 *Neurosci* 8, 7. doi: 10.3389/fnbeh.2014.00007.
- 701 Magnani, P.E., Genovez, M.B., Porto, J.M., Zanellato, N.F.G., Alvarenga, I.C., Freire, R.C., Jr., et al.  
702 (2020). Use of the BESTest and the Mini-BESTest for Fall Risk Prediction in Community-  
703 Dwelling Older Adults Between 60 and 102 Years of Age. *J Geriatr Phys Ther* 43(4), 179-184.  
704 doi: 10.1519/JPT.000000000000236.
- 705 Manor, B., Zhou, J., Harrison, R., Lo, O.Y., Trivison, T.G., Hausdorff, J.M., et al. (2018). Transcranial  
706 Direct Current Stimulation May Improve Cognitive-Motor Function in Functionally Limited Older  
707 Adults. *Neurorehabil Neural Repair* 32(9), 788-798. doi: 10.1177/1545968318792616.
- 708 Marlin, A., Mochizuki, G., Staines, W.R., and McIlroy, W.E. (2014). Localizing evoked cortical activity  
709 associated with balance reactions: does the anterior cingulate play a role? *J Neurophysiol*  
710 111(12), 2634-2643. doi: 10.1152/jn.00511.2013.
- 711 McIlroy, W.E., and Maki, B.E. (1993). Changes in early 'automatic' postural responses associated with  
712 the prior-planning and execution of a compensatory step. *Brain Res* 631(2), 203-211. doi:  
713 10.1016/0006-8993(93)91536-2.
- 714 McKay, J.L., Lang, K.C., Bong, S.M., Hackney, M.E., Factor, S.A., and Ting, L.H. (2021). Abnormal  
715 center of mass feedback responses during balance: A potential biomarker of falls in Parkinson's  
716 disease. *PLoS One* 16(5), e0252119. doi: 10.1371/journal.pone.0252119.
- 717 McKay, J.L., Lang, K.C., Ting, L.H., and Hackney, M.E. (2018). Impaired set shifting is associated with  
718 previous falls in individuals with and without Parkinson's disease. *Gait Posture* 62, 220-226. doi:  
719 10.1016/j.gaitpost.2018.02.027.
- 720 Mierau, A., Hulsdunker, T., and Struder, H.K. (2015). Changes in cortical activity associated with  
721 adaptive behavior during repeated balance perturbation of unpredictable timing. *Front Behav*  
722 *Neurosci* 9(272), 272. doi: 10.3389/fnbeh.2015.00272.
- 723 Mirelman, A., Herman, T., Brozgol, M., Dorfman, M., Sprecher, E., Schweiger, A., et al. (2012).  
724 Executive function and falls in older adults: new findings from a five-year prospective study link  
725 fall risk to cognition. *PLoS One* 7(6), e40297. doi: 10.1371/journal.pone.0040297.
- 726 Mochizuki, G., Boe, S., Marlin, A., and McIlroy, W.E. (2010). Perturbation-evoked cortical activity  
727 reflects both the context and consequence of postural instability. *Neuroscience* 170(2), 599-609.  
728 doi: 10.1016/j.neuroscience.2010.07.008.
- 729 Mochizuki, G., Sibley, K.M., Esposito, J.G., Camilleri, J.M., and McIlroy, W.E. (2008). Cortical  
730 responses associated with the preparation and reaction to full-body perturbations to upright  
731 stability. *Clin Neurophysiol* 119(7), 1626-1637. doi: 10.1016/j.clinph.2008.03.020.

- 732 Muir, S.W., Gopaul, K., and Montero Odasso, M.M. (2012). The role of cognitive impairment in fall risk  
733 among older adults: a systematic review and meta-analysis. *Age Ageing* 41(3), 299-308. doi:  
734 10.1093/ageing/afs012.
- 735 Nashner, L.M. (1979). Organization and programming of motor activity during posture control. *Prog*  
736 *Brain Res* 50, 177-184. doi: 10.1016/S0079-6123(08)60818-3.
- 737 Nasreddine, Z.S., Phillips, N.A., Bedirian, V., Charbonneau, S., Whitehead, V., Collin, I., et al. (2005).  
738 The Montreal Cognitive Assessment, MoCA: a brief screening tool for mild cognitive impairment.  
739 *J Am Geriatr Soc* 53(4), 695-699. doi: 10.1111/j.1532-5415.2005.53221.x.
- 740 Nobrega-Sousa, P., Gobbi, L.T.B., Orcioli-Silva, D., Conceicao, N.R.D., Beretta, V.S., and Vitorio, R.  
741 (2020). Prefrontal Cortex Activity During Walking: Effects of Aging and Associations With Gait  
742 and Executive Function. *Neurorehabil Neural Repair* 34(10), 915-924. doi:  
743 10.1177/1545968320953824.
- 744 Okada, S., Hirakawa, K., Takada, Y., and Kinoshita, H. (2001). Relationship between fear of falling and  
745 balancing ability during abrupt deceleration in aged women having similar habitual physical  
746 activities. *Eur J Appl Physiol* 85(6), 501-506. doi: 10.1007/s004210100437.
- 747 Ozdemir, R.A., Contreras-Vidal, J.L., and Paloski, W.H. (2018). Cortical control of upright stance in  
748 elderly. *Mech Ageing Dev* 169, 19-31. doi: 10.1016/j.mad.2017.12.004.
- 749 Palmer, J.A., Payne, A.M., Ting, L.H., and Borich, M.R. (2021). Cortical Engagement Metrics During  
750 Reactive Balance Are Associated With Distinct Aspects of Balance Behavior in Older Adults.  
751 *Frontiers in Aging Neuroscience* 13. doi: 10.3389/fnagi.2021.684743.
- 752 Payne, A.M., Hajcak, G., and Ting, L.H. (2019a). Dissociation of muscle and cortical response scaling  
753 to balance perturbation acceleration. *J Neurophysiol* 121(3), 867-880. doi:  
754 10.1152/jn.00237.2018.
- 755 Payne, A.M., and Ting, L.H. (2020a). Worse balance is associated with larger perturbation-evoked  
756 cortical responses in healthy young adults. *Gait & Posture* 80, 324-330. doi:  
757 10.1016/j.gaitpost.2020.06.018.
- 758 Payne, A.M., and Ting, L.H. (2020c). Balance perturbation-evoked cortical N1 responses are larger  
759 when stepping and not influenced by motor planning. *J Neurophysiol* 124(6), 1875-1884. doi:  
760 10.1152/jn.00341.2020.
- 761 Peterson, S.M., and Ferris, D.P. (2018). Differentiation in Theta and Beta Electro cortical Activity  
762 between Visual and Physical Perturbations to Walking and Standing Balance. *eNeuro* 5(4). doi:  
763 10.1523/ENEURO.0207-18.2018.
- 764 Peterson, S.M., and Ferris, D.P. (2019). Group-level cortical and muscular connectivity during  
765 perturbations to walking and standing balance. *Neuroimage* 198, 93-103. doi:  
766 10.1016/j.neuroimage.2019.05.038.
- 767 Pieruccini-Faria, F., Lord, S.R., Toson, B., Kemmler, W., and Schoene, D. (2019). Mental Flexibility  
768 Influences the Association Between Poor Balance and Falls in Older People - A Secondary  
769 Analysis. *Front Aging Neurosci* 11, 133. doi: 10.3389/fnagi.2019.00133.
- 770 Prochazka, A. (1989). Sensorimotor gain control: a basic strategy of motor systems? *Prog Neurobiol*  
771 33(4), 281-307.
- 772 Quant, S., Adkin, A.L., Staines, W.R., Maki, B.E., and McIlroy, W.E. (2004b). The effect of a concurrent  
773 cognitive task on cortical potentials evoked by unpredictable balance perturbations. *Bmc*  
774 *Neuroscience* 5(18), 1-12. doi: 10.1186/1471-2202-5-18.
- 775 Rankin, J.K., Woollacott, M.H., Shumway-Cook, A., and Brown, L.A. (2000). Cognitive influence on  
776 postural stability: a neuromuscular analysis in young and older adults. *J Gerontol A Biol Sci Med*  
777 *Sci* 55(3), M112-119.
- 778 Reuter-Lorenz, P.A., and Cappell, K.A. (2008). Neurocognitive Aging and the Compensation  
779 Hypothesis. *Current Directions in Psychological Science* 17(3), 177-182. doi: 10.1111/j.1467-  
780 8721.2008.00570.x.
- 781 Safavynia, S.A., and Ting, L.H. (2013b). Long-latency muscle activity reflects continuous, delayed  
782 sensorimotor feedback of task-level and not joint-level error. *J Neurophysiol* 110(6), 1278-1290.  
783 doi: 10.1152/jn.00609.2012.



- 784 Sanchez-Cubillo, I., Perianez, J.A., Adrover-Roig, D., Rodriguez-Sanchez, J.M., Rios-Lago, M., Tirapu,  
785 J., et al. (2009). Construct validity of the Trail Making Test: role of task-switching, working  
786 memory, inhibition/interference control, and visuomotor abilities. *J Int Neuropsychol Soc* 15(3),  
787 438-450. doi: 10.1017/S1355617709090626.
- 788 Shumway-Cook, A., Woollacott, M., Kerns, K.A., and Baldwin, M. (1997). The effects of two types of  
789 cognitive tasks on postural stability in older adults with and without a history of falls. *J Gerontol*  
790 *A Biol Sci Med Sci* 52(4), M232-240.
- 791 Smith-Ray, R.L., Hughes, S.L., Prohaska, T.R., Little, D.M., Jurivich, D.A., and Hedeker, D. (2015).  
792 Impact of Cognitive Training on Balance and Gait in Older Adults. *J Gerontol B Psychol Sci Soc*  
793 *Sci* 70(3), 357-366. doi: 10.1093/geronb/gbt097.
- 794 Sombric, C.J., and Torres-Oviedo, G. (2021). Cognitive and Motor Perseveration Are Associated in  
795 Older Adults. *Frontiers in Aging Neuroscience* 13. doi: 10.3389/fnagi.2021.610359.
- 796 St George, R.J., Hinder, M.R., Puri, R., Walker, E., and Callisaya, M.L. (2021). Functional Near-infrared  
797 Spectroscopy Reveals the Compensatory Potential of Pre-frontal Cortical Activity for Standing  
798 Balance in Young and Older Adults. *Neuroscience* 452, 208-218. doi:  
799 10.1016/j.neuroscience.2020.10.027.
- 800 Steinberg, B.A., Bieliauskas, L.A., Smith, G.E., and Ivnik, R.J. (2005). Mayo's Older Americans  
801 Normative Studies: Age- and IQ-Adjusted Norms for the Trail-Making Test, the Stroop Test, and  
802 MAE Controlled Oral Word Association Test. *Clin Neuropsychol* 19(3-4), 329-377. doi:  
803 10.1080/13854040590945210.
- 804 Stuart, S., Vitorio, R., Morris, R., Martini, D.N., Fino, P.C., and Mancini, M. (2018). Cortical activity  
805 during walking and balance tasks in older adults and in people with Parkinson's disease: A  
806 structured review. *Maturitas* 113, 53-72. doi: 10.1016/j.maturitas.2018.04.011.
- 807 Tangen, G.G., Engedal, K., Bergland, A., Moger, T.A., and Mengshoel, A.M. (2014). Relationships  
808 between balance and cognition in patients with subjective cognitive impairment, mild cognitive  
809 impairment, and Alzheimer disease. *Phys Ther* 94(8), 1123-1134. doi: 10.2522/ptj.20130298.
- 810 Taube, W., Schubert, M., Gruber, M., Beck, S., Faist, M., and Gollhofer, A. (2006). Direct corticospinal  
811 pathways contribute to neuromuscular control of perturbed stance. *J Appl Physiol* (1985) 101(2),  
812 420-429. doi: 10.1152/jappphysiol.01447.2005.
- 813 Tayeb, Y., and Lavidor, M. (2016). Enhancing switching abilities: Improving practice effect by  
814 stimulating the dorsolateral pre frontal cortex. *Neuroscience* 313, 92-98. doi:  
815 10.1016/j.neuroscience.2015.11.050.
- 816 Tombaugh, T. (2004). Trail Making Test A and B: Normative data stratified by age and education.  
817 *Archives of Clinical Neuropsychology* 19(2), 203-214. doi: 10.1016/s0887-6177(03)00039-8.
- 818 Torres-Oviedo, G., and Ting, L.H. (2007). Muscle synergies characterizing human postural responses.  
819 *J Neurophysiol* 98(4), 2144-2156. doi: 10.1152/jn.01360.2006.
- 820 Weerdesteyn, V., Laing, A.C., and Robinovitch, S.N. (2008). Automated postural responses are  
821 modified in a functional manner by instruction. *Exp Brain Res* 186(4), 571-580. doi:  
822 10.1007/s00221-007-1260-1.
- 823 Zaback, M., Adkin, A.L., and Carpenter, M.G. (2019). Adaptation of emotional state and standing  
824 balance parameters following repeated exposure to height-induced postural threat. *Sci Rep*  
825 9(1), 12449. doi: 10.1038/s41598-019-48722-z.
- 826 Zgaljardic, D.J., Borod, J.C., Foldi, N.S., Mattis, P.J., Gordon, M.F., Feigin, A., et al. (2006). An  
827 examination of executive dysfunction associated with frontostriatal circuitry in Parkinson's  
828 disease. *J Clin Exp Neuropsychol* 28(7), 1127-1144. doi: 10.1080/13803390500246910.
- 829
